# Supplementary material for: Characterization of fecal fat composition and gut derived fecal microbiota in high-fat diet fed rats following intervention with chito-oligosaccharide and resistant starch complexes
Source: Royal Society of Chemistry journal article supplement (doi:10.1039/c7fo01244f), 2017-01-01

**Fig. S1** Effect of administration of CO, RS and the complexes on bile acids content in serum. NC: normal diet, HF: high-fat diet, CO: chito-oligosaccharides administration, RS: resistant starch administration (RS), CO-RS: chito-oligosaccharides - resistant starch administration.

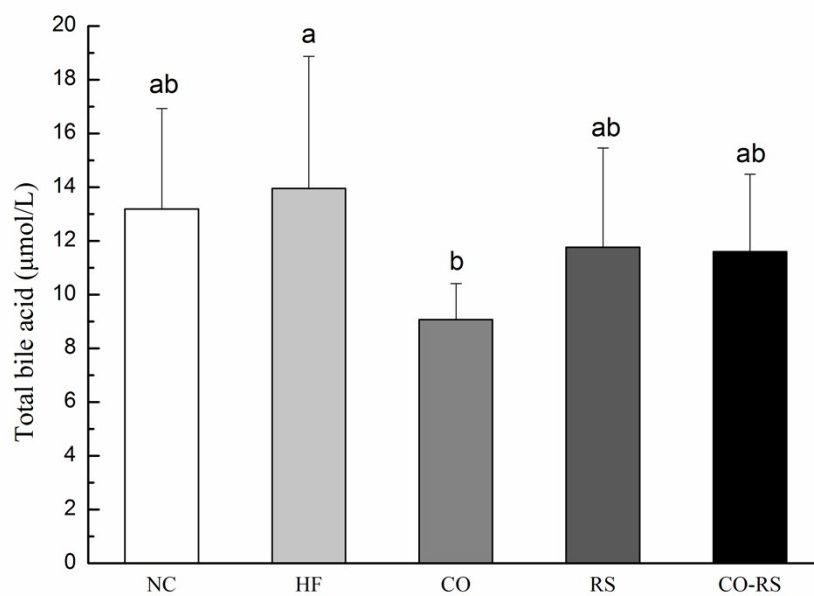

**Fig. S2** Venn diagram showing the unique and shared OTUs.

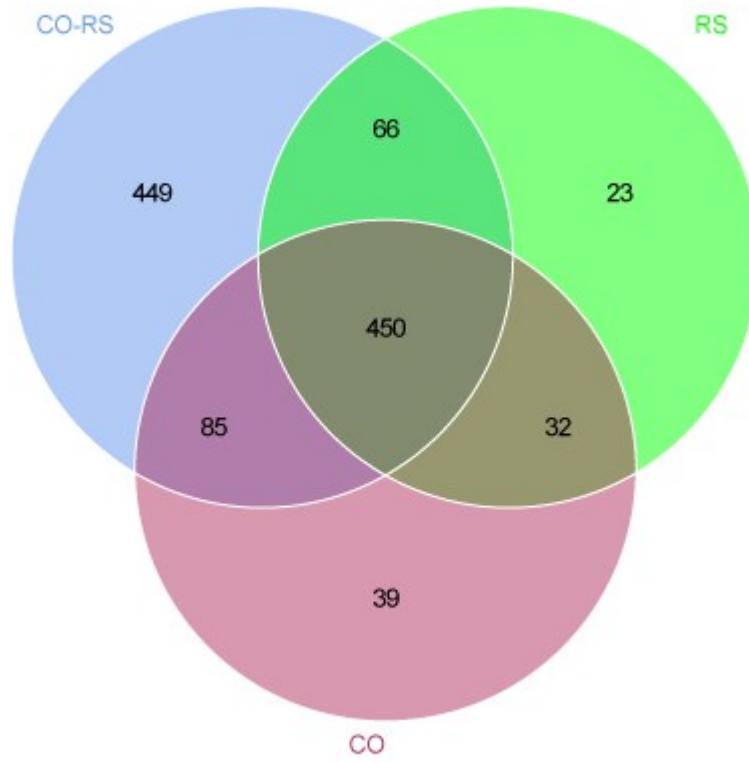

**Fig. S3** Beta diversity analysis based on weighted (a) and unweighted (b) UniFrac distance metric (n = 6).

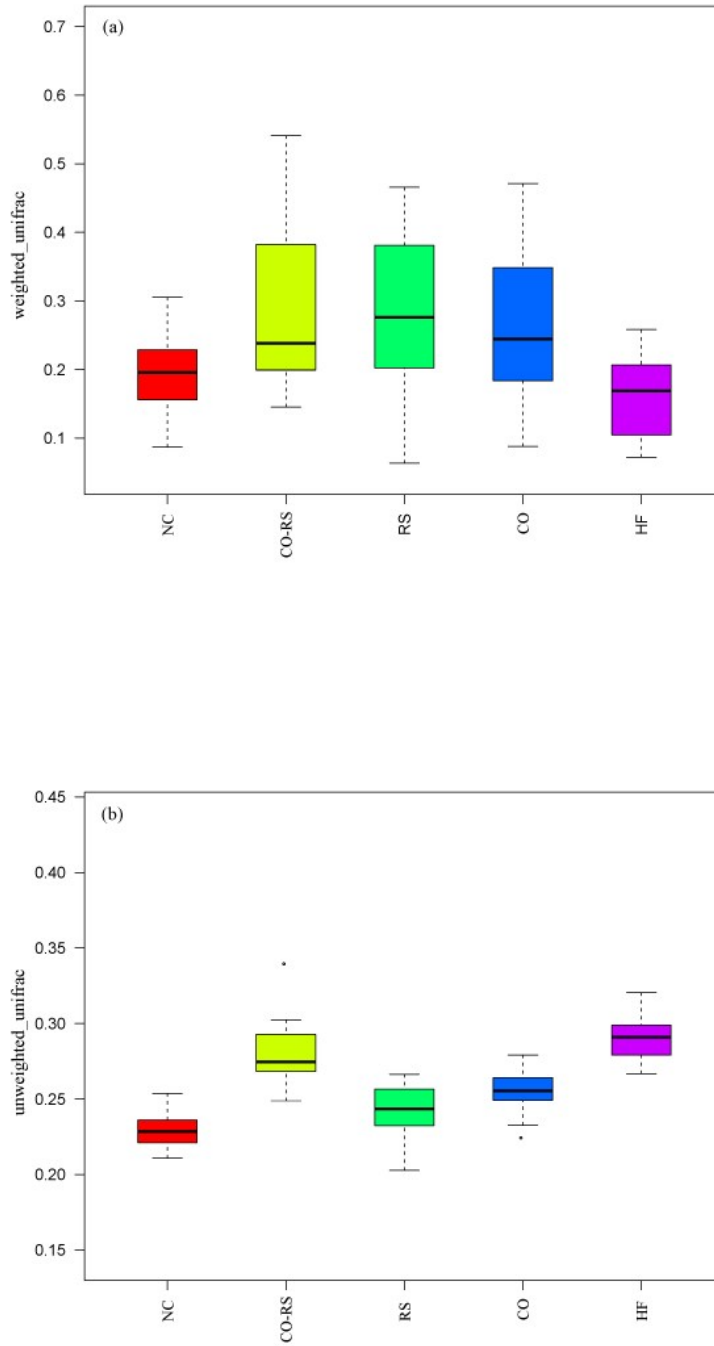

Supplement: c7fo01244f1.pdf [file c7fo01244f1.pdf]
